# Supplementary figures and images for: Characterization of the 3,4-Dichloroaniline Degradation Gene Cluster in Acinetobacter soli GFJ2
Source: MDPI journal article supplement (doi:10.3390/microorganisms12030613), 2024-03-19

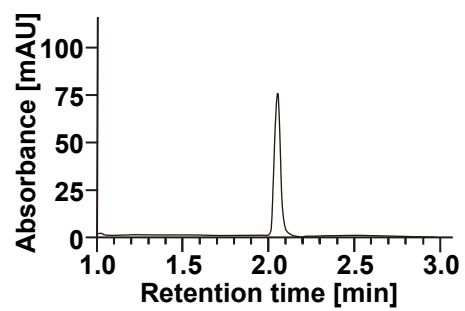

**Figure. S1**

**Figure. S1** HPLC chromatogram of the authentic 4,5-dichlorocatechol

Supplement: s1 [file s1]
